# Supplementary material for: Bacterial community diversity, lignocellulose components, and histological changes in composting using agricultural straws for Agaricus bisporus production
Source: PeerJ. 2021 Feb 9;9:e10452. doi: 10.7717/peerj.10452 (PMC7879949; doi:10.7717/peerj.10452)
Supplement: Supplemental Information 3 [file peerj-09-10452-s003.docx]

| **Item** | **Time 2015 (Mean±SE)a** | | |  | **Time 2016 (Mean±SE)a** | | |  | **Time 2017 (Mean±SE)a** | | |
| --- | --- | --- | --- | --- | --- | --- | --- | --- | --- | --- | --- |
| TY (g/kg) | T3 (g/kg) | BE (%) |  | TY (g/kg) | T3 (g/kg) | BE (%) |  | TY (g/kg) | T3 (g/kg) | BE (%) |
| **CS** | 618.7±30.80a | 481.5±26.62a | 77.8±0.69b |  | 601.4±63.34a | 520.7±45.50ab | 87.1±2.21a |  | 570.0±23.68a | 501.5±25.69a | 88.4±5.49a |
| **WS** | 517.7±28.51ab | 381.9±25.32b | 73.7±1.73b |  | 609.0±25.94a | 552.7±16.33a | 90.9±1.63a |  | 582.9±10.73a | 501.2±20.17a | 88.0±3.45a |
| **RS** | 564.5±15.60ab | 515.8±11.02a | 91.4±1.33a |  | 531.3±36.92a | 427.9±35.13ab | 80.4±1.99ab |  | 565.5±37.41a | 502.0±35.92a | 88.7±1.97a |
| **CC** | 462.4±26.60bc | 354.5±4.53b | 77.3±3.78b |  | 531.0±41.29a | 418.2±37.77b | 78.8±4.27ab |  | 500.8±30.21ab | 365.7±35.15b | 72.6±2.88ab |
| **C** | 389.9±11.68cd | 245.4±11.50c | 63.1±1.23c |  | 346.9±20.39b | 231.4±7.18c | 74.0±2.94b |  | 374.5±36.44bc | 224.1±17.05c | 60.4±3.06b |
| **B** | 322.4±18.57d | 245.2±11.37c | 76.4±2.77b |  | 288.9±17.93b | 223.3±12.46c | 77.4±1.3ab |  | 344.9±28.97c | 283.2±27.96bc | 82.9±7.18a |
| **ANOVAb** | 22.95** | 44.41** | 17.25** |  | 13.12** | 22.75** | 6.04** |  | 12.96** | 19.41** | 6.55** |

**S3** Analysis of mushroom yield (*Agaricus bisporus*) cultured on six different AS-based substances in three years

aData were expressed as mean ± standard error (n=10). The data in the same column marked with different small case letters are significantly

different(Tukey’s HSD, *p*<0.05).b *F* value in one-way ANOVA: *p*<0.05 (*) or 0.01 (**)
